# Supplementary material for: Difference between the North Atlantic and Pacific meridional overturning circulation in response to the uplift of the Tibetan Plateau
Source: Copernicus journal article supplement (doi:10.5194/cp-14-751-2018), 2018-06-08
Supplement: Supplementary file 1 [file cp-14-751-2018-supplement.zip]

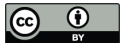

## *Supplement of*

# **Difference between the North Atlantic and Pacific meridional overturning circulation in response to the uplift of the Tibetan Plateau**

**Baohuang Su et al.**

*Correspondence to:* Dabang Jiang (jiangdb@mail.iap.ac.cn)

- cp-14-751-2018-supplement-title-page.pdf
- Fig.1a1b.nc
- Fig.1c.nc
- Fig.1d.nc
- Fig.1e 1h.nc
- Fig.2a.nc
- Fig.2b.nc
- Fig.2c.nc
- Fig.2d.nc
- Fig.3a.nc
- Fig.3b.nc
- Fig.3c.nc
- Fig.4.nc
- Fig.5Fig.7.nc
- Fig.6a.nc
- Fig.6b.nc
- Fig.6c.nc

The copyright of individual parts of the supplement might differ from the CC BY 4.0 License.
